# Supplementary material for: Patient-reported outcomes from a phase III study of baricitinib in patients with conventional synthetic DMARD-refractory rheumatoid arthritis
Source: PubMed Central journal article supplement — RMD Open. 2017 Mar 21;3(1):e000410. doi: 10.1136/rmdopen-2016-000410 (PMC5372156; doi:10.1136/rmdopen-2016-000410), 2017-03-21
Supplement: rmdopen-2016-000410supp.pdf [file rmdopen-2016-000410supp.pdf]

Supplemental Material.

**Table S1. Change from baseline in HAQ-DI in subgroups defined by concomitant csDMARD therapy**

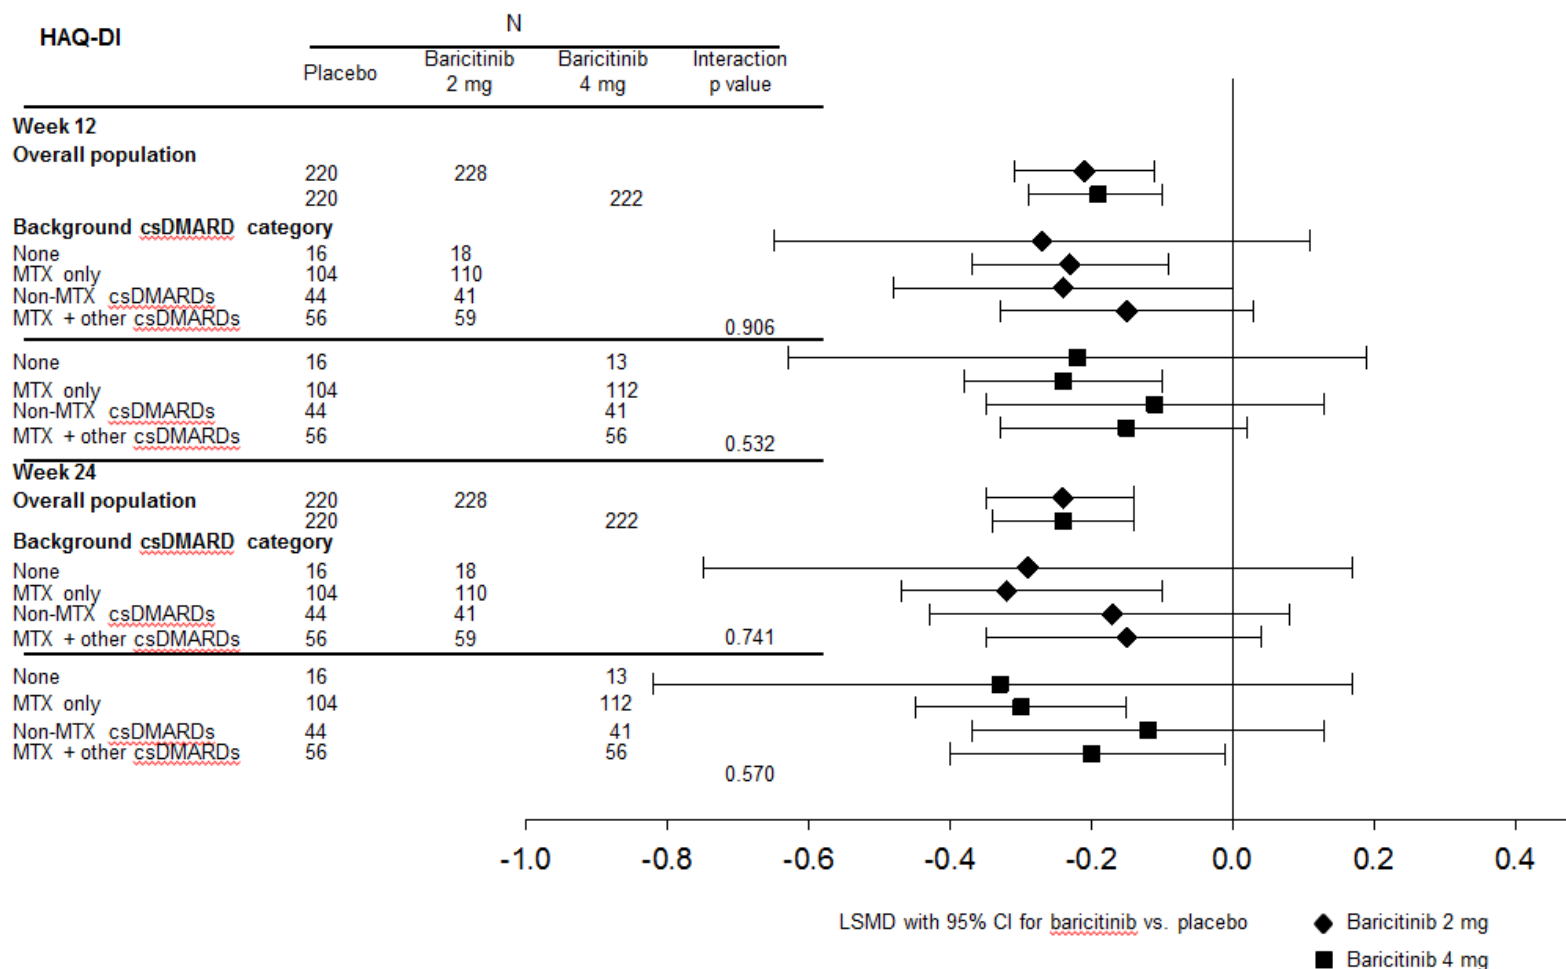

**Table S2. Baseline values and least squares mean changes from baseline at Weeks 12 and 24 for SF-36 domain scores**

| SF-36 domain scores  | Baseline mean (SD) |                          |                          | Week 12 LSM     |                          |                          | Week 24 LSM     |                          |                          |
|----------------------|--------------------|--------------------------|--------------------------|-----------------|--------------------------|--------------------------|-----------------|--------------------------|--------------------------|
|                      | Placebo (N=228)    | Baricitinib 2 mg (N=229) | Baricitinib 4 mg (N=227) | Placebo (N=228) | Baricitinib 2 mg (N=229) | Baricitinib 4 mg (N=227) | Placebo (N=228) | Baricitinib 2 mg (N=229) | Baricitinib 4 mg (N=227) |
| Physical functioning | 32.1 (10.1)        | 32.2 (10.6)              | 32.3 (10.0)              | 4.0             | 7.2***                   | 6.7**                    | 5.0             | 8.1***                   | 7.9**                    |
| Role physical        | 35.5 (8.9)         | 34.9 (9.2)               | 35.4 (9.4)               | 4.3             | 6.4**                    | 5.6                      | 4.6             | 7.0**                    | 6.4*                     |
| Bodily pain          | 34.6 (7.3)         | 34.8 (8.0)               | 35.2 (7.5)               | 4.7             | 8.5***                   | 8.0***                   | 5.8             | 9.7***                   | 10.2***                  |
| General health       | 36.9 (7.7)         | 37.3 (8.7)               | 36.3 (8.3)               | 3.4             | 5.7**                    | 6.0***                   | 3.0             | 5.8***                   | 7.3***                   |
| Vitality             | 41.6 (9.9)         | 41.7 (10.7)              | 42.4 (9.8)               | 4.9             | 6.9*                     | 6.7*                     | 5.5             | 6.7                      | 8.0**                    |
| Social functioning   | 39.8 (11.4)        | 39.7 (10.9)              | 41.1 (11.3)              | 3.6             | 4.6                      | 4.2                      | 3.9             | 4.6                      | 5.0                      |
| Role emotional       | 41.7 (12.1)        | 40.0 (12.1)              | 41.2 (12.8)              | 3.4             | 3.9                      | 4.2                      | 3.1             | 4.0                      | 4.4                      |
| Mental health        | 42.7 (11.0)        | 42.7 (12.0)              | 43.5 (11.8)              | 3.3             | 4.0                      | 4.3                      | 2.6             | 3.5                      | 4.2                      |

\*p≤0.05, \*\*p≤0.01, \*\*\*p≤0.001 vs. placebo

Supplementary Figure

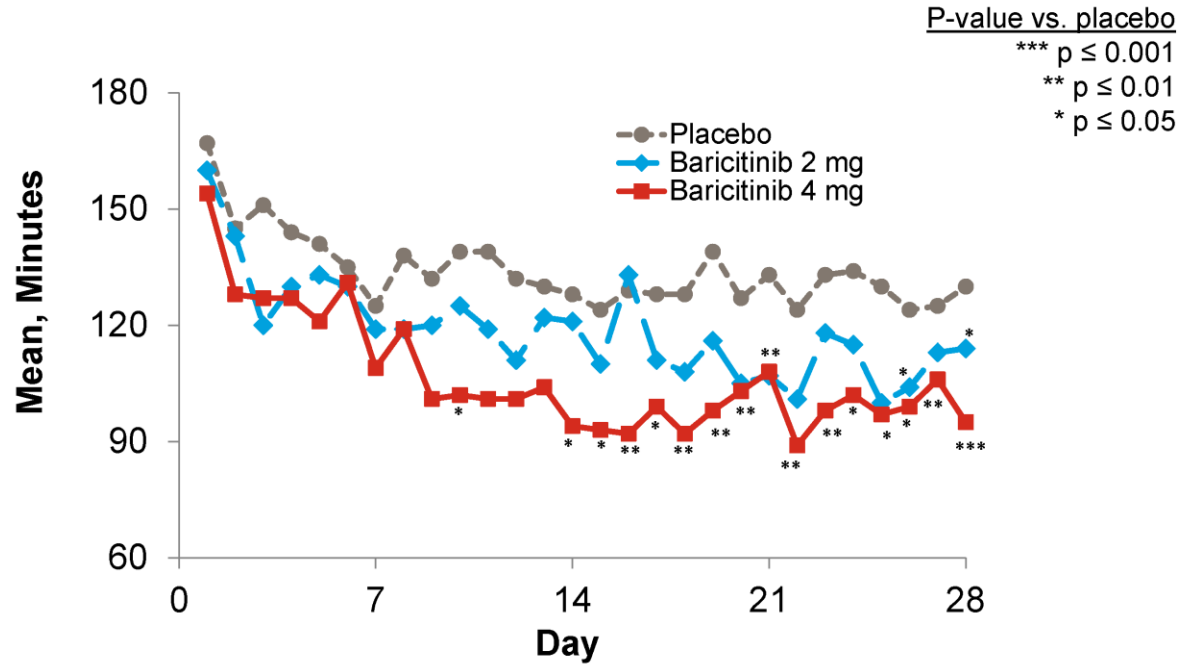

Data are mean duration of morning joint stiffness in minutes, based on daily diary entries. Daily question: "Please indicate how long your morning joint stiffness lasted today."

Indications of statistical significance based on analysis of median difference

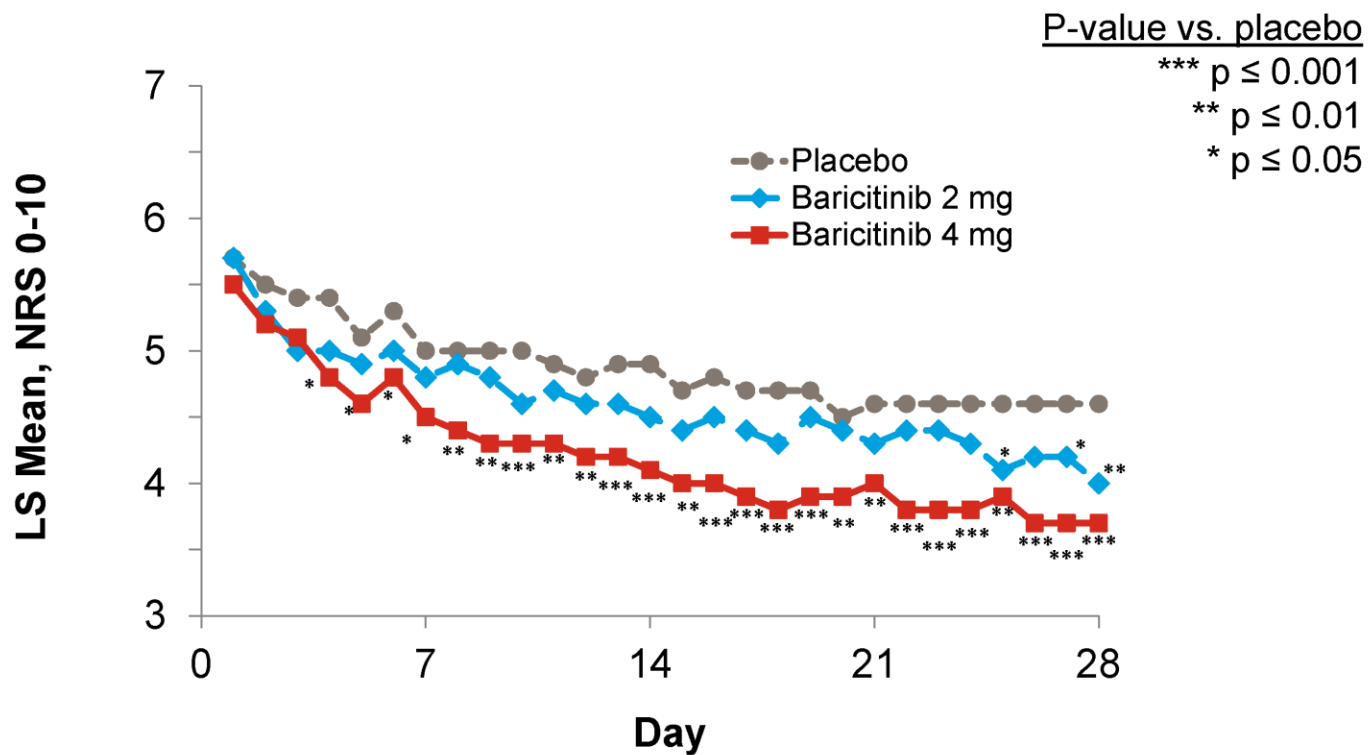

Data are LS mean scores for severity of morning joint stiffness, based on daily diary entries. Higher values indicate greater severity with numeric rating scale anchors (0 to 10). Daily question: "Please rate the overall level of morning joint stiffness you had from the time you woke up today."

Abbreviations: LS =Least Squares; NRS= numeric rating scale

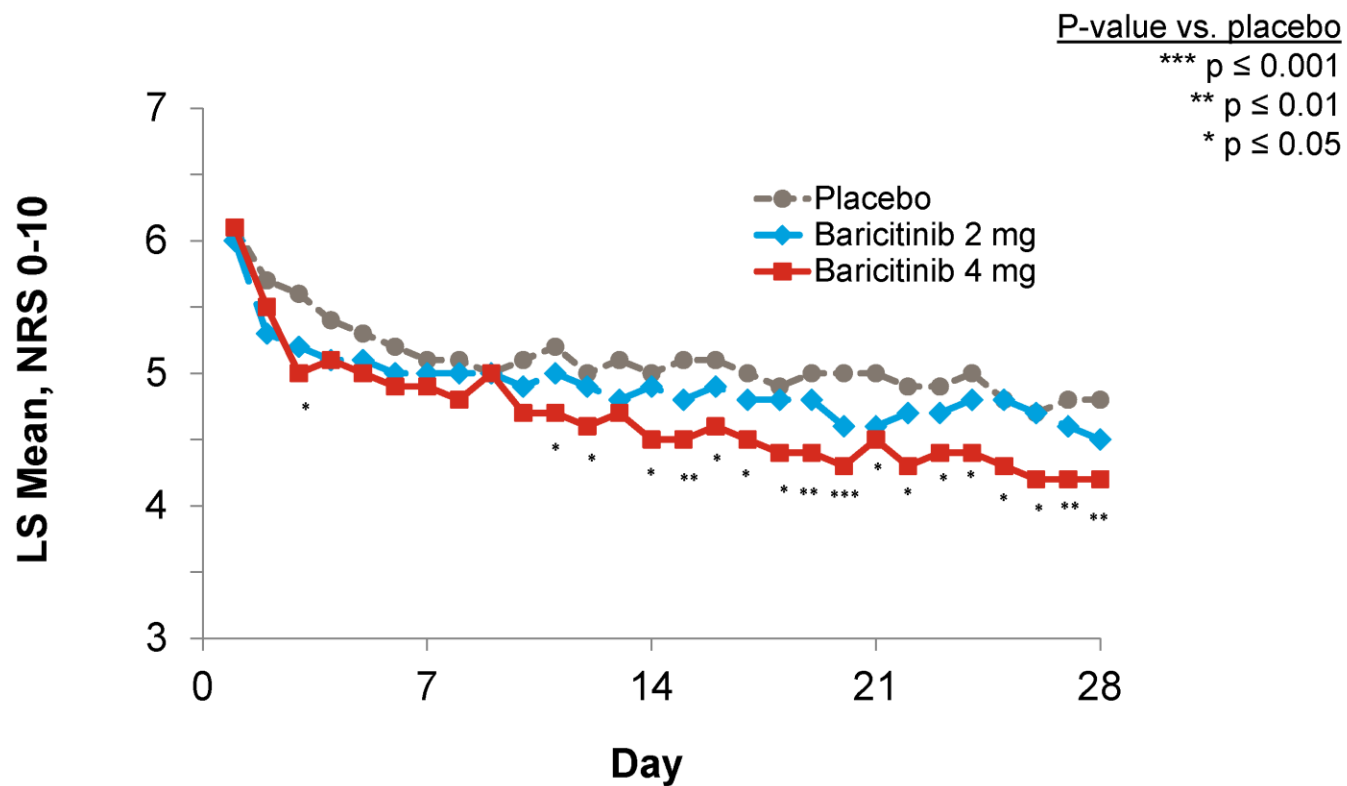

Data are LS mean scores for worst tiredness, based on daily diary entries. Higher values indicate greater tiredness with numeric rating scale anchors (0 to 10) . Daily question: "Please rate your tiredness by selecting the one number that describes your tiredness at its worst in the last 24 hours."

Abbreviations: LS =Least Squares; NRS= numeric rating scale

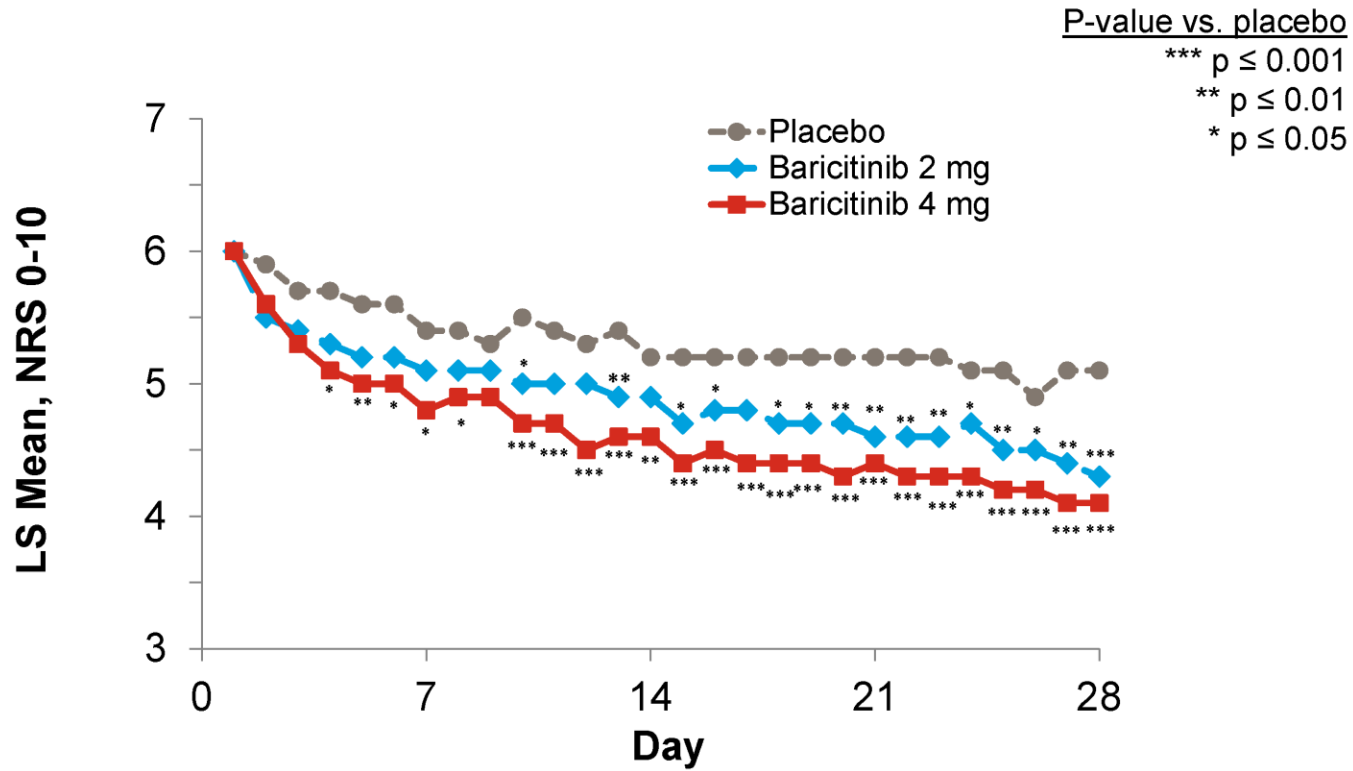

Data are LS mean scores for worst joint pain, based on daily diary entries. Higher values indicate greater pain with numeric rating scale anchors (0 to 10). Daily question: "Please rate your joint pain by selecting the one number that describes your joint pain at its worst in the last 24 hours."

Abbreviations: LS =Least Squares; NRS= numeric rating scale
